# Supplementary material for: Overexpression of LINC00551 promotes autophagy-dependent ferroptosis of lung adenocarcinoma via upregulating DDIT4 by sponging miR-4328
Source: PeerJ journal article supplement (doi:10.7717/peerj.14180), 2022-10-12

Figure 2E

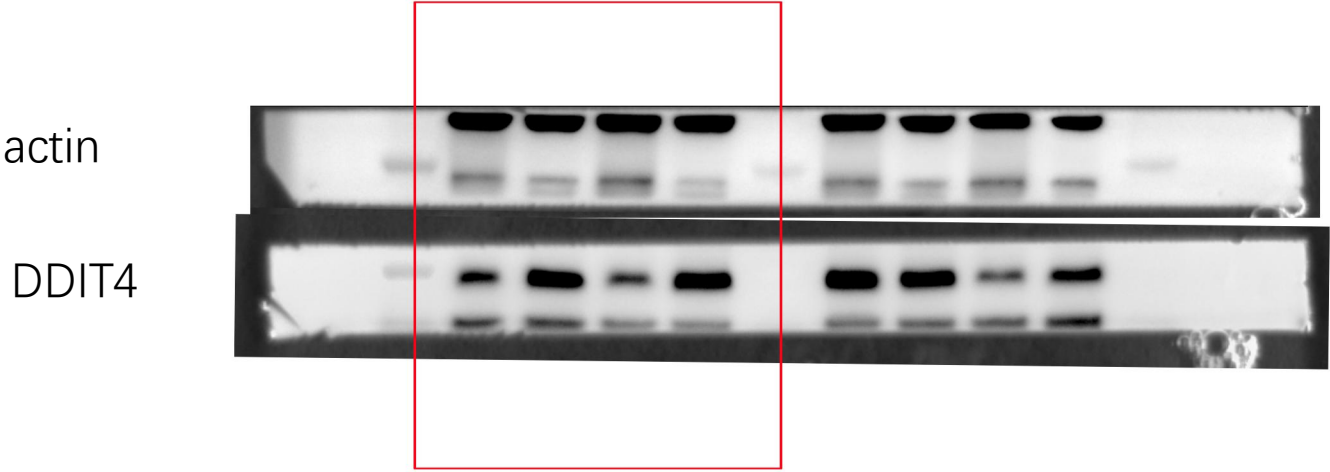

Figure 3E

P62

SLC7A11

actin

DDIT4

GPX4

LC3

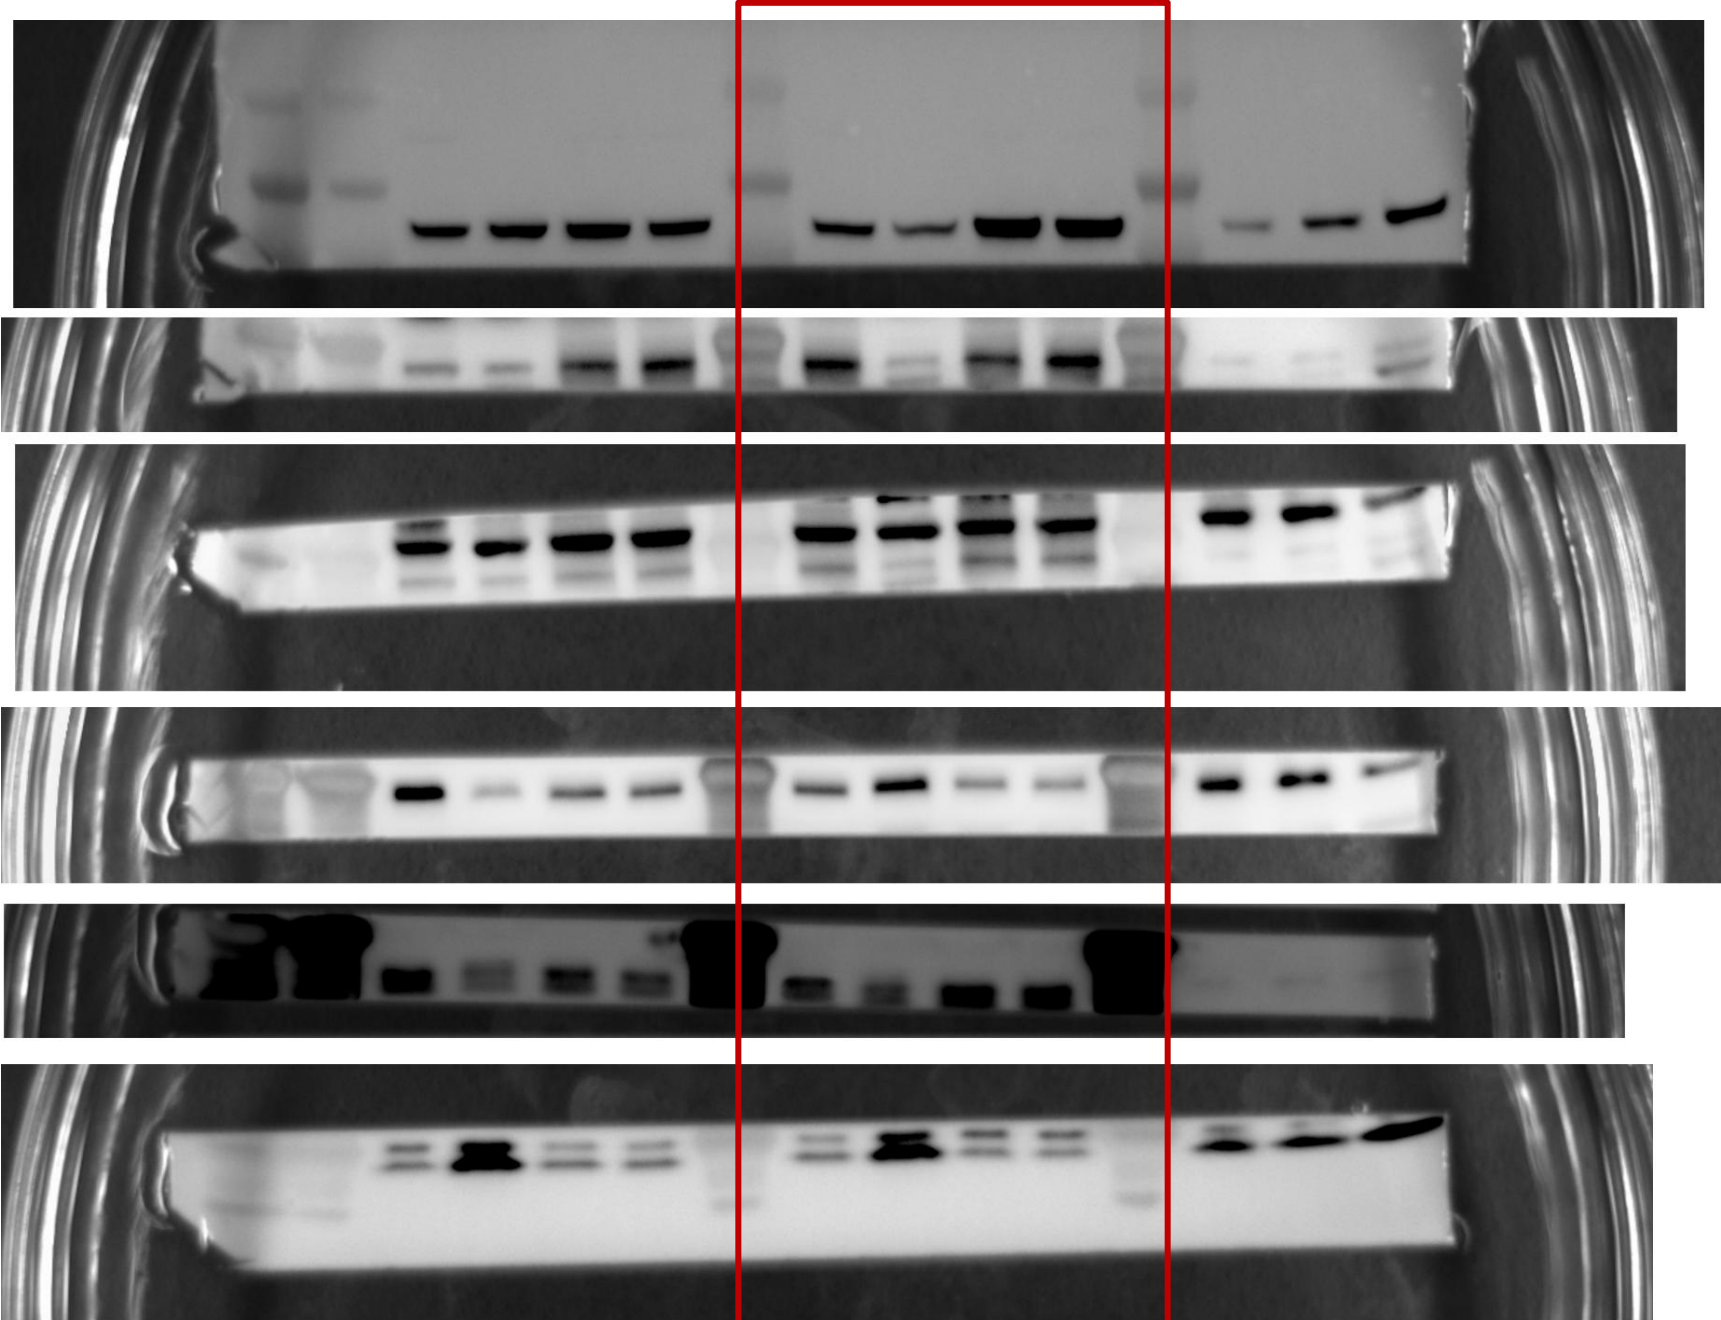

Figure 4B

P62

SLC7A11

actin

GPX4

LC3

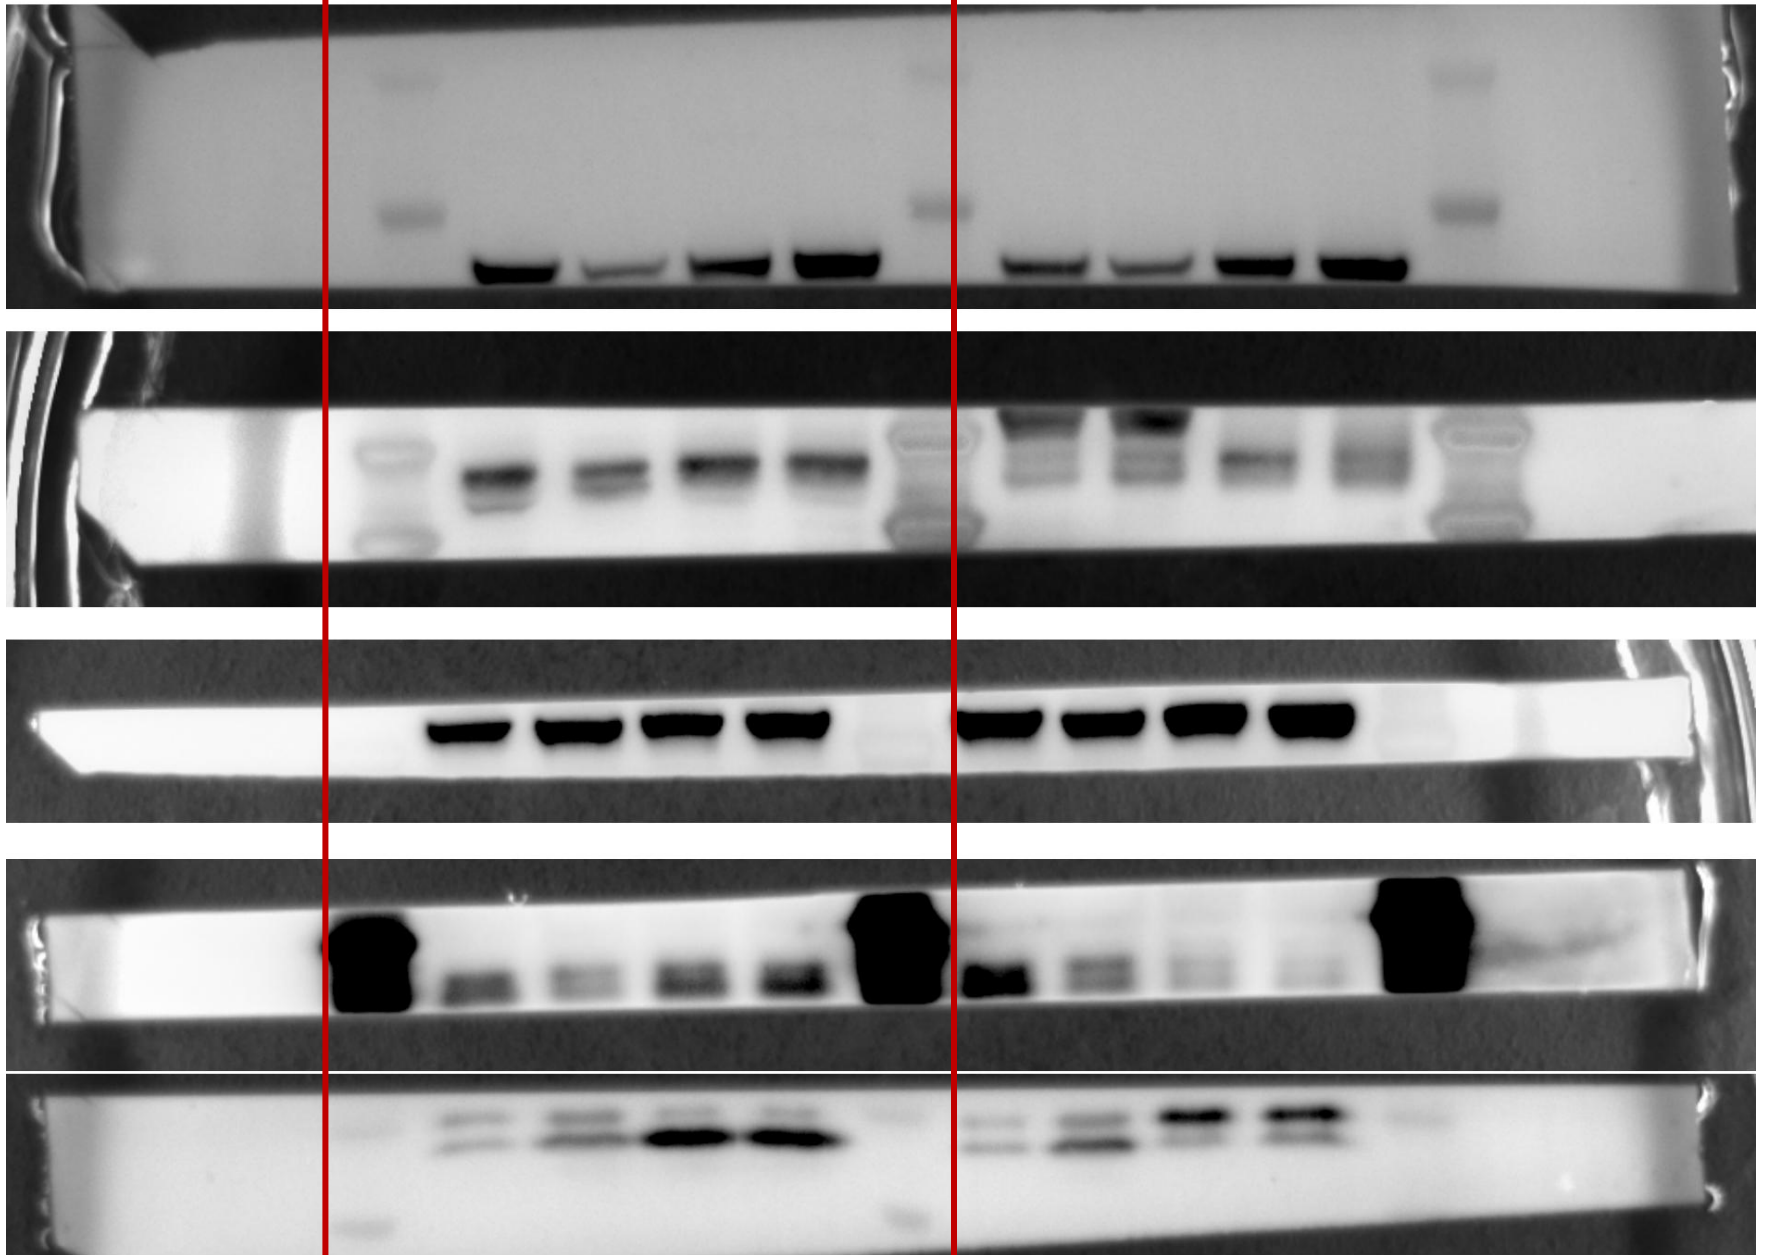

Figure 4F

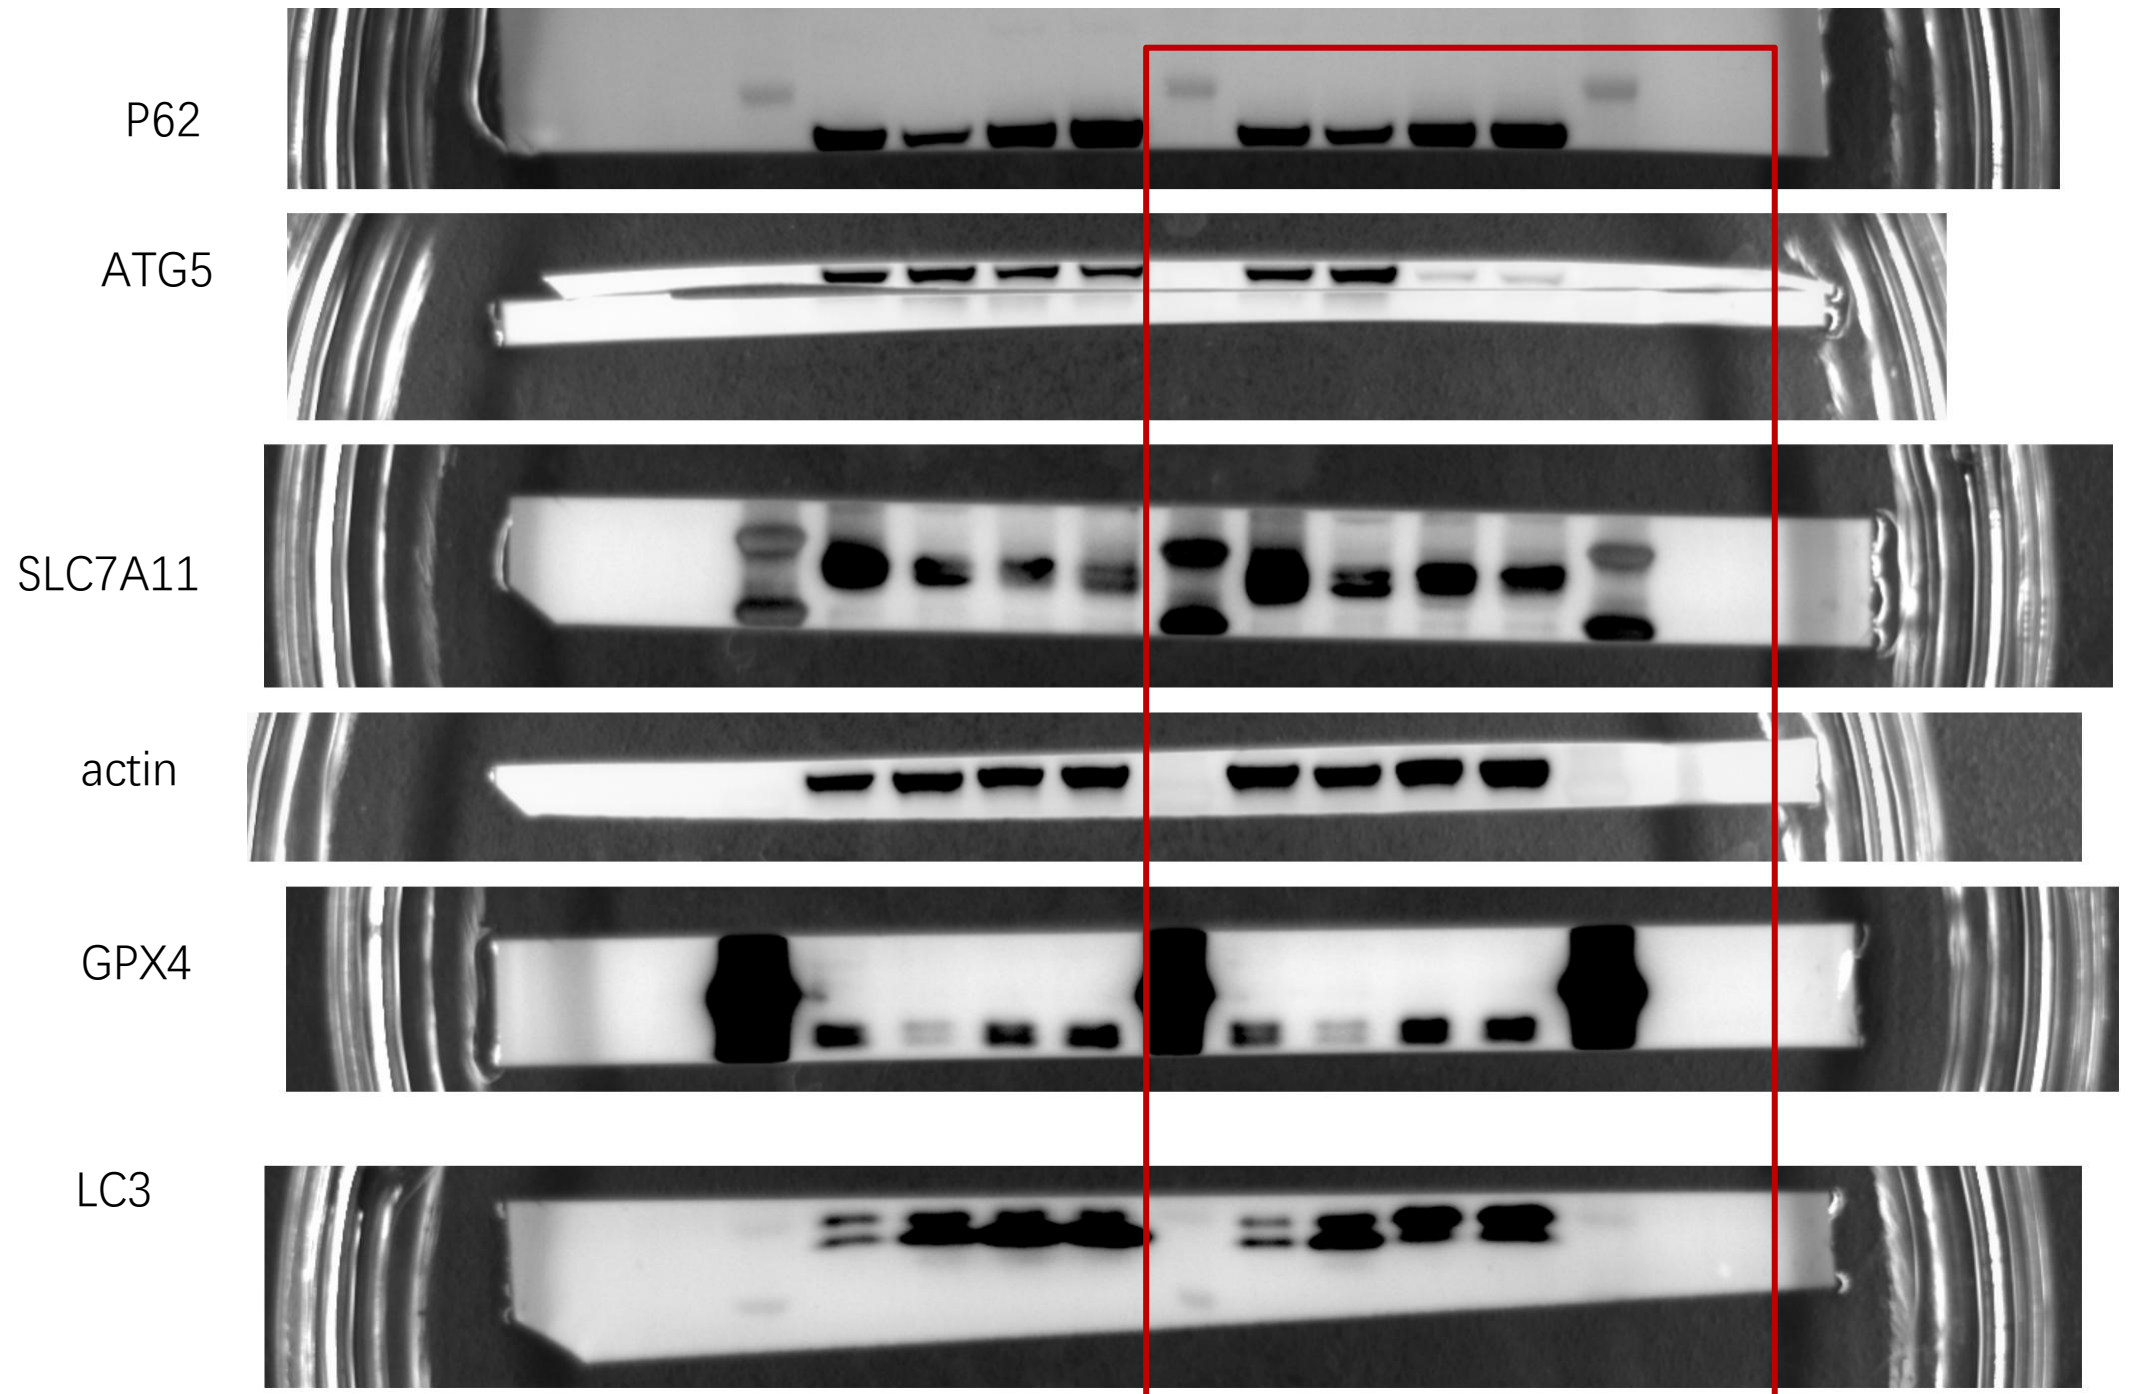

Supplement: Raw_pictures_of_western_blot.pdf [file Raw_pictures_of_western_blot.pdf]
